# Supplementary figures and images for: The exploration of three different treatment models of osimertinib plus antiangiogenic agents in non‐small cell lung cancer: A real‐world study
Source: PubMed Central journal article supplement — Thorac Cancer. 2022 Aug 9;13(18):2641–9. doi: 10.1111/1759-7714.14603 (PMC9475224; doi:10.1111/1759-7714.14603), 2022-08-09

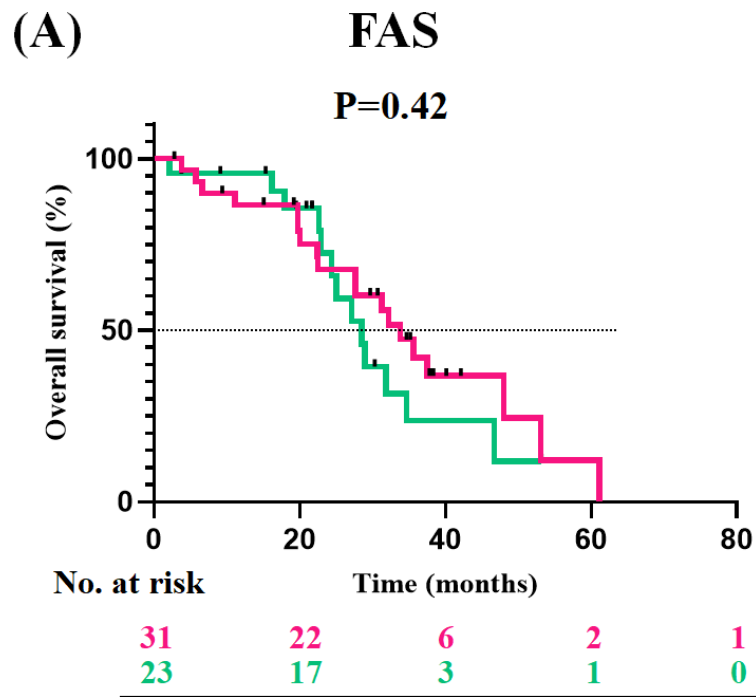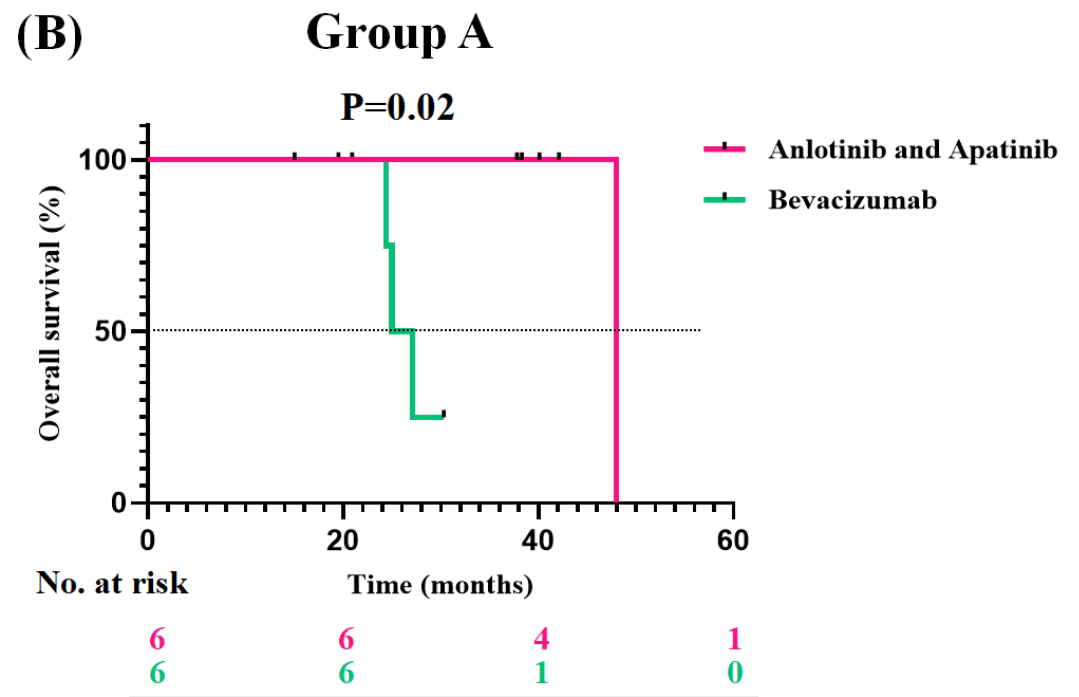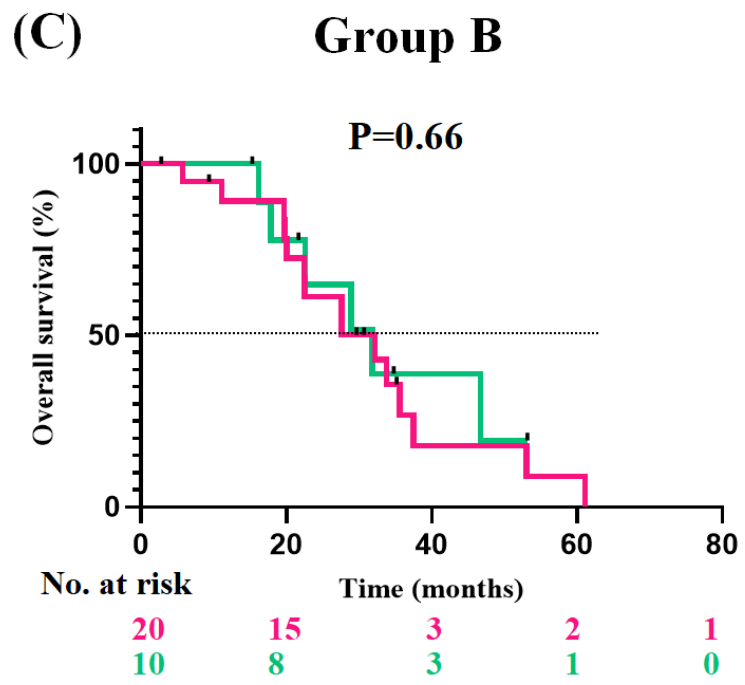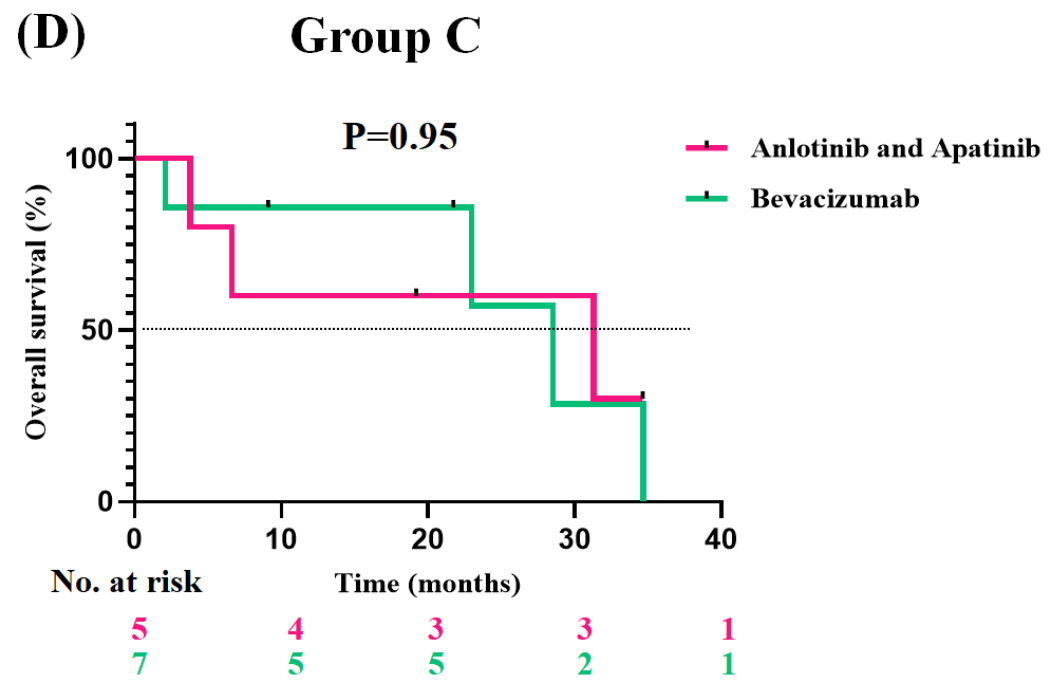

Supplement: TCA-13-2641-s001.pdf [file TCA-13-2641-s001.pdf]

# FAS

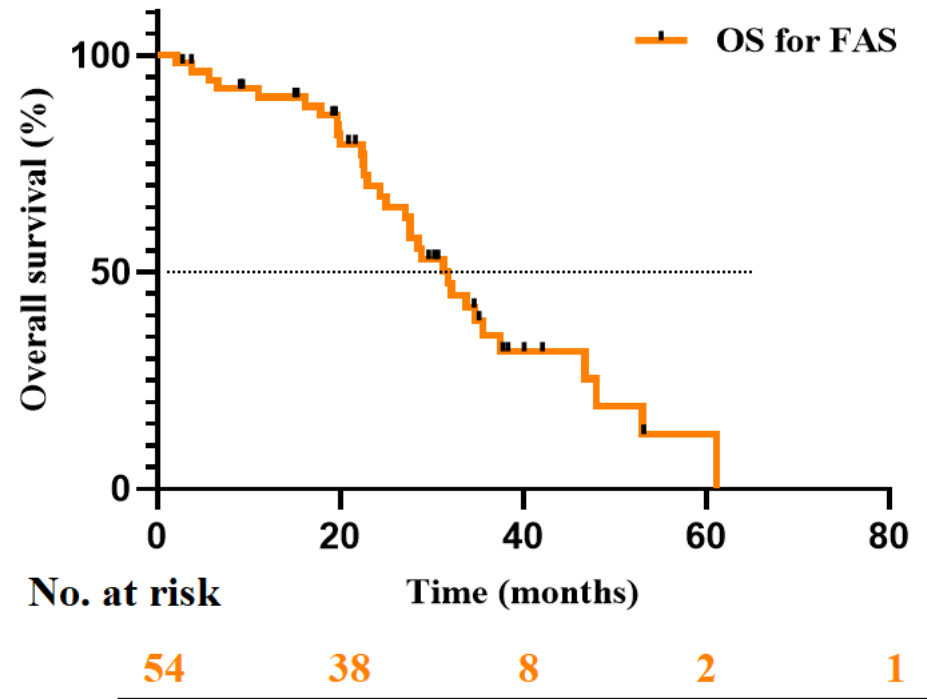

Supplement: TCA-13-2641-s003.pdf [file TCA-13-2641-s003.pdf]
